# Supplementary material
Source: Springer Nature journal article supplement (https://www.springermedizin.de/resource/supplementary/12885_2008_1204_MOESM3_ESM.pdf/9471400)

miR-34a

miR-34b

miR-34c

Control

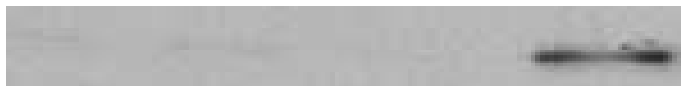

Bcl-2

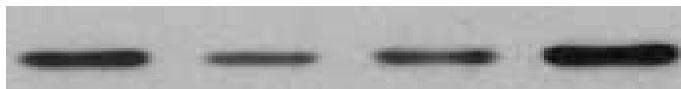

Bax

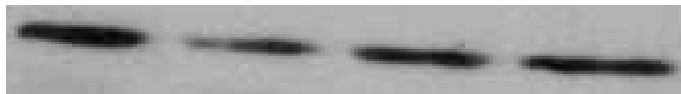

Mcl-1

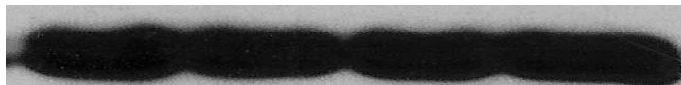

Bcl-xL

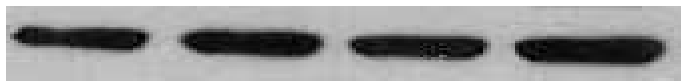

GAPDH

Supplement: MOESM3 [file 9471400]
